# Supplementary material for: Synthesis of InP branched nanostructures by controlling the intermediate nanoclusters
Source: Royal Society of Chemistry journal article supplement (doi:10.1039/c9tc05845a), 2019-12-03
Supplement: c9tc05845a1.pdf [file c9tc05845a1.pdf]

## Supporting Information

# Synthesis of InP Branched Nanostructures by Controlling the Intermediate Nanoclusters

Yongju Kwon<sup>a</sup>, Gyuhyun Bang<sup>a</sup>, Jeongmin Kim<sup>a</sup>, Anastasia Agnes<sup>a</sup> and Sungjee Kim<sup>\*a</sup>

<sup>a</sup> Department of Chemistry, Pohang University of Science and Technology, Pohang 37673, South Korea

## Experimental

**Chemicals.** Indium acetate ( $\text{In}(\text{Ac})_3$ , 99.99%), indium chloride ( $\text{InCl}_3$ , 98%), myristic acid (HMy) ( $\geq 99\%$ ), anhydrous toluene (99.5%), 1-octadecene (ODE, 90%), acetonitrile (99.8%) were purchased from Aldrich. Tris(trimethylsilyl)phosphine ( $(\text{TMS})_3\text{P}$ ) (95%) was purchased from SK chemicals. All chemicals were used without further purification.

### Synthetic procedures

**General procedure for synthesis of 386-MSCs.** 386-MSCs were synthesized using a reported method.<sup>1</sup> First, 0.8 mmol of  $\text{In}(\text{Ac})_3$  and 2.9 mmol of HMy in a three-necked round-bottom flask containing 20 mL ODE was degassed for 2 hours at 110 °C, then 0.4 mmol of  $(\text{TMS})_3\text{P}$  was added to the mixture and it was stirred for 2 hours under  $\text{N}_2$  atmosphere.

**Purification of 386-MSCs.** As-synthesized 386-MSCs were purified with toluene as solvent and acetonitrile as anti-solvent twice by precipitation-dissolution. First, 35 mL acetonitrile was added into 0.5 mL 386-MSCs solution in conical tube and followed by centrifugation (4500 rpm, 3 minutes). After discarding transparent supernatant and drying, yellow precipitants were dissolved with 0.5 mL anhydrous toluene. 35 mL acetonitrile was added into 0.5 mL 386-MSCs solution again and followed by centrifugation (4500 rpm, 3 minutes). Final products were stored in anhydrous toluene.

**General procedure for synthesis of InP NPs from molecular precursors.** First, 0.4 mmol of  $\text{In}(\text{Ac})_3$  and 1.2 mmol of HMy were prepared in 12 mL ODE. The solution was degassed for 2 hours at 110 °C and cool down to room temperature, then 0.4 mmol of  $(\text{TMS})_3\text{P}$  was added to the mixture. The mixture solution was heated to 300 °C and maintained for 30 minutes under  $\text{N}_2$  atmosphere. Heating rate is around 20 °C/min.

**General procedure for synthesis of InP NPs from purified 386-MSCs.** First, 12 mL ODE was degassed for 1 hour at 110 °C and cool down to room temperature. Purified 386-MSCs in toluene was added to ODE making 0.44 mM solution at room temperature and the toluene was removed under vacuum. After that, the solution was heated to 300 °C. Heating rate is around 20 °C/min. The temperature was maintained for 30 minutes and followed by cooling down.

**General procedure for synthesis of InP NPs from purified 386-MSCs and  $\text{In}(\text{My})_3$ .** First, 0.3 mmol of  $\text{In}(\text{Ac})_3$  and 0.9 mmol of HMy were prepared in 12 mL ODE. The solution was degassed for 2 hours at 110 °C and cool down to room temperature. Purified 386-MSCs in toluene was added to  $\text{In}(\text{My})_3$  solution making 0.44 mM solution at room temperature and the toluene was removed under vacuum. After that, the solution was heated to 300 °C. Heating rate is around 20 °C/min. The temperature was maintained for 30 minutes and followed by cooling down.

**General procedure for synthesis of InP NPs from as-synthesized 386-MSCs.** First, 4 mL ODE was degassed for 1 hour at 110 °C and cool down to room temperature. As-synthesized 386-MSCs solution with 8 mL volume was injected into ODE at room temperature. After that, the solution containing the 386-MSCs was heated to 300 °C. Heating rate is around 20 °C/min. The temperature was maintained for 30 minutes and followed by cooling down.

**General procedure for synthesis of InP NPs from as-synthesized 386-MSCs and HMy.** First, 0.34 mmol of HMy were prepared in 4 mL ODE. The solution was degassed for 1 hour at 110 °C and cool down to room temperature. As-synthesized 386-MSCs solution with 8 mL volume was injected into the HMy solution at room temperature. After that, the mixture solution containing the 386-MSCs and HMy was heated to 300 °C. Heating rate is around 20 °C/min. The temperature was maintained for 30 minutes and followed by cooling down.

**General procedure for synthesis of InP NPs from as-synthesized 386-MSCs and In(My)<sub>3</sub>.** First, 0.3 mmol of In(Ac)<sub>3</sub> and 0.9 mmol of HMy were prepared in 4 mL ODE. The solution was degassed for 2 hours at 110 °C and cool down to room temperature. As-synthesized 386-MSCs solution with 8 mL volume was injected into the In(My)<sub>3</sub> solution at room temperature. After that, the mixture solution containing the 386-MSCs and In(My)<sub>3</sub> complex was heated to 300 °C. Heating rate is around 20 °C/min. The temperature was maintained for 30 minutes and followed by cooling down.

**General procedure for synthesis of InP BNSs from 386-MSCs.** First, 0.3 mmol of In(Ac)<sub>3</sub> and 0.9 mmol of HMy were prepared in 4 mL ODE. The solution was degassed for 2 hours at 110 °C and cool down to room temperature. As-synthesized 386-MSCs solution with 8 mL volume was injected into the In(My)<sub>3</sub> solution at room temperature. After that, the mixture solution containing the 386-MSCs and In(My)<sub>3</sub> complex was heated to 220 °C. Heating rate is around 20 °C/min. The temperature was maintained for 20 minutes and followed by cooling down.

**General procedure for synthesis of InP HBNSs and DLNSs from 386-MSCs.** First, 0.3 mmol of In(Ac)<sub>3</sub> was prepared in 4 mL ODE. The solution was degassed for 1 hour at 110 °C and cool down to room temperature. As-synthesized 386-MSCs solution with 8 mL volume was injected into the In(Ac)<sub>3</sub> solution at room temperature. After that, the mixture solution containing the 386-MSCs and In(Ac)<sub>3</sub> complex was heated to 220 °C. Heating rate is around 20 °C/min. The temperature was maintained for 20 minutes and followed by cooling down.

**General procedure for synthesis of quasi-amorphous ~2 nm NPs from 386-MSCs.** First, 0.3 mmol of In(Ac)<sub>3</sub> and 0.9 mmol of HMy were prepared in 4 mL ODE. The solution was degassed for 2 hours at 110 °C and cool down to room temperature. As-synthesized 386-MSCs solution with 8 mL volume was injected into the In(My)<sub>3</sub> solution at room temperature. After that, the mixture solution containing the 386-MSCs and In(My)<sub>3</sub> complex was heated to 110 °C. The temperature was maintained for 6 hours and followed by cooling down.

**Size-selective purification of InP BNSs, InP HBNSs, and InP DLNSs.** Size-selective purification was performed by using toluene-methanol co-solvents. First, 1 mL crude sample (InP BNSs or InP HBNSs and DLNSs) was mixed with 9 mL toluene and 4 mL methanol was added into the solution. The mixture solution was centrifuged under the condition of 3000 rpm for 3 minutes. Precipitate contains only InP BNSs or InP DLNSs without amorphous clusters.

**Characterization.** Absorption spectra were measured using an Agilent 8453 UV-vis spectrophotometer. Transmission electron microscopy (TEM) images were acquired using a JEOL JEM-2100 microscope operating at 200 kV. X-ray diffraction (XRD) experiments were performed using a Dmax2500/PC (Rigaku) diffractometer with Cu K $\alpha$  radiation.

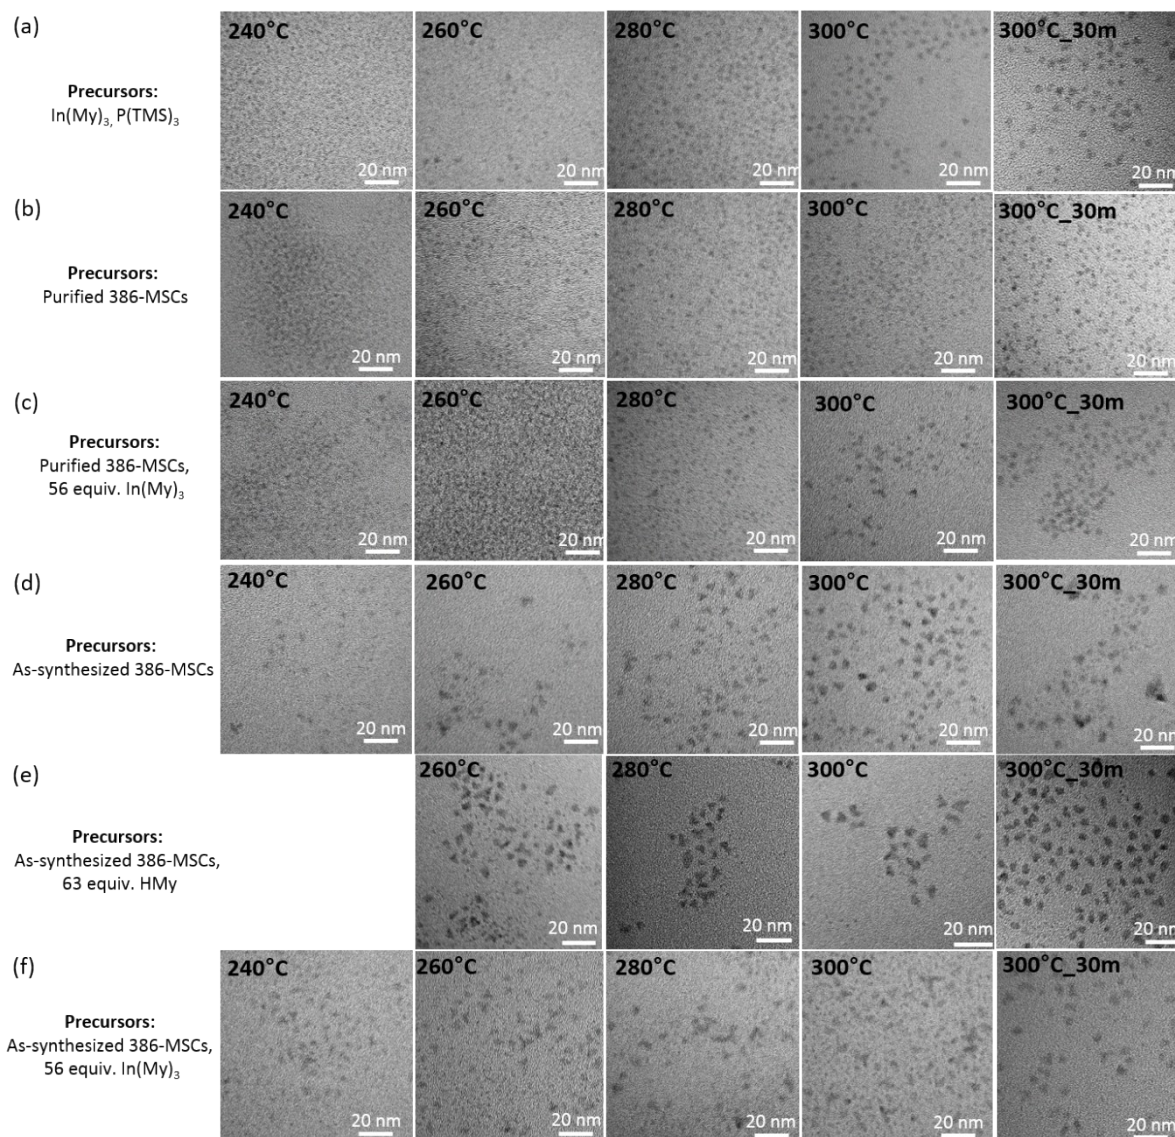

**Figure S1.** TEM images of aliquots taken over time during heating to 300 °C from (a) the 2:1 molar mixture of In(My)<sub>3</sub> and (TMS)<sub>3</sub>P, (b) purified 0.44 mM 386-MSCs, (c) 0.44 mM 386-MSCs with additional 56 equivalents of In(My)<sub>3</sub>, (d) as-synthesized 0.44 mM 386-MSCs, (e) as-synthesized 0.44 mM 386-MSCs with additional 63 equivalents of HMy, (f) as-synthesized 0.44 mM 386-MSCs with additional 56 equivalents of In(My)<sub>3</sub>.

- **Precursors**  
: Purified 386-MSCs
- **Reaction temperature**  
: 220 °C

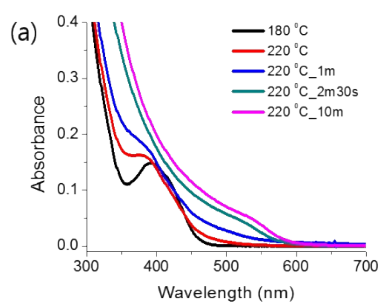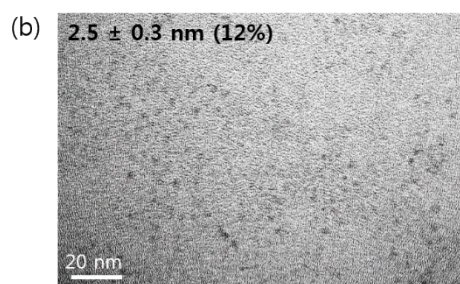

- **Precursors**  
: As-synthesized 386-MSCs
- **Reaction temperature**  
: 220 °C

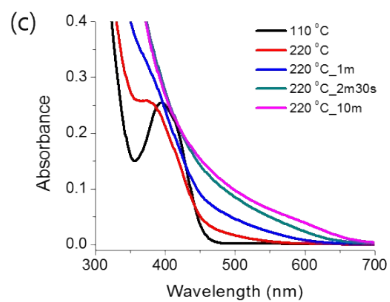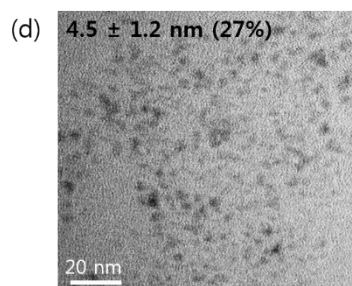

**Figure S2.** UV-vis absorption spectra of aliquots taken over time upon heating to 220 °C and TEM images of the final samples for the heat-up reactions of: (a, b) purified 0.44 mM 386-MSCs, (c, d) as-synthesized 0.44 mM 386-MSCs.

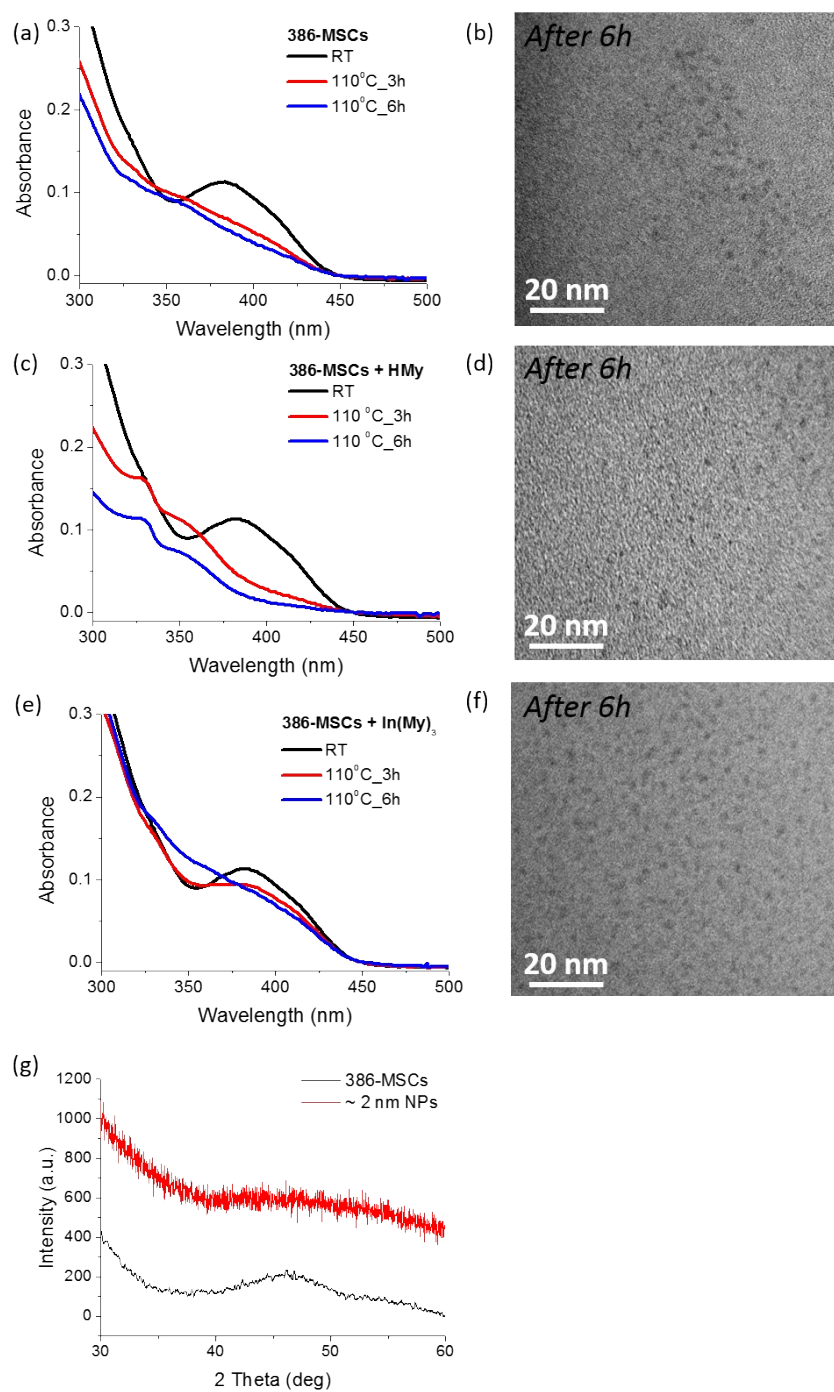

**Figure S3.** UV-vis absorption spectra of aliquots taken over time upon heating at 110 °C and TEM images of the final samples for the reaction of: (a,b) as-synthesized 386-MSCs, (c,d) as-synthesized 386-MSCs with additional 56 equivalents of HMy, (d,e) as-synthesized 386-MSCs with additional 56 equivalents of In(My)<sub>3</sub>. (g) XRD patterns of 386-MSCs and 2 nm InP NPs which were synthesized by reacting 386-MSCs and 56 equivalents of In(My)<sub>3</sub> at 110 °C for 6 hours.

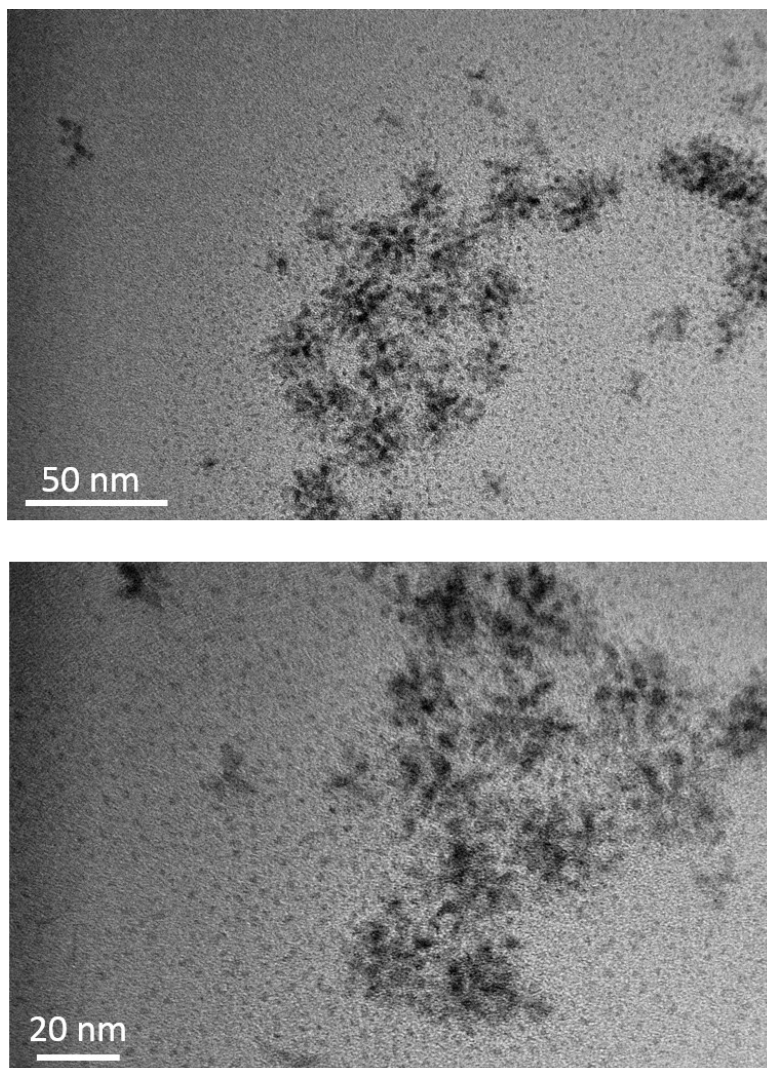

**Figure S4.** TEM images of InP HPNSs and DLNSs formed by the reaction of 386-MSCs and 56 equivalents of  $\text{In}(\text{Ac})_3$ .

**Table S1.** The In/P atomic ratios of 386-MSCs, 2 nm amorphous NPs, and BNSs.

|                           | <b>In</b> | <b>P</b> |
|---------------------------|-----------|----------|
| <b>386-MSCs</b>           | 1         | 0.54     |
| <b>2 nm Amorphous NPs</b> | 1         | 0.33     |
| <b>BNSs</b>               | 1         | 0.71     |

## Reference

1. Gary, D. C.; Terban, M. W.; Billinge, S. J. L.; Cossairt, B. M., Two-Step Nucleation and Growth of InP Quantum Dots via Magic-Sized Cluster Intermediates. *Chemistry of Materials* **2015**, *27* (4), 1432-1441.
